# Supplementary material for: EB1 binding restricts STIM1 translocation to ER–PM junctions and regulates store-operated Ca2+ entry
Source: PubMed Central journal article supplement — J Cell Biol. 2018 Jun 4;217(6):2047–58. doi: 10.1083/jcb.201711151 (PMC5987725; doi:10.1083/jcb.201711151), 2018-06-04
Supplement: JCB_201711151_sm.pdf [file JCB_201711151_sm.pdf]

## Supplemental material

Chang et al., <https://doi.org/10.1083/jcb.201711151>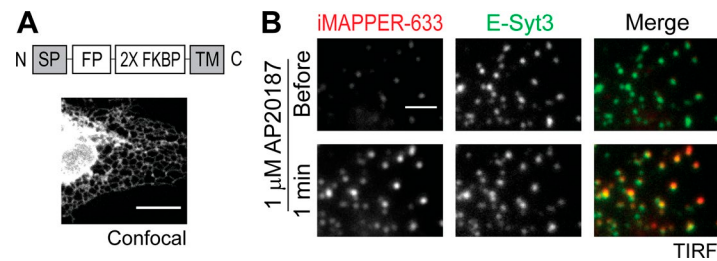

Figure S1. **Localization of 2x FKBP-TM and translocation iMAPPER-633 to ER-PM junctions.** (A) Diagram of 2x FKBP-TM construct and its ER localization as shown by confocal microscopy in HeLa cells. (B) Translocation of mCherry-iMAPPER-633 to ER-PM junctions after 1  $\mu$ M AP20187 treatment, monitored by TIRF microscopy in HeLa cells cotransfected with GFP-E-Syt3. Bars: (A) 10  $\mu$ m; (B) 2  $\mu$ m.

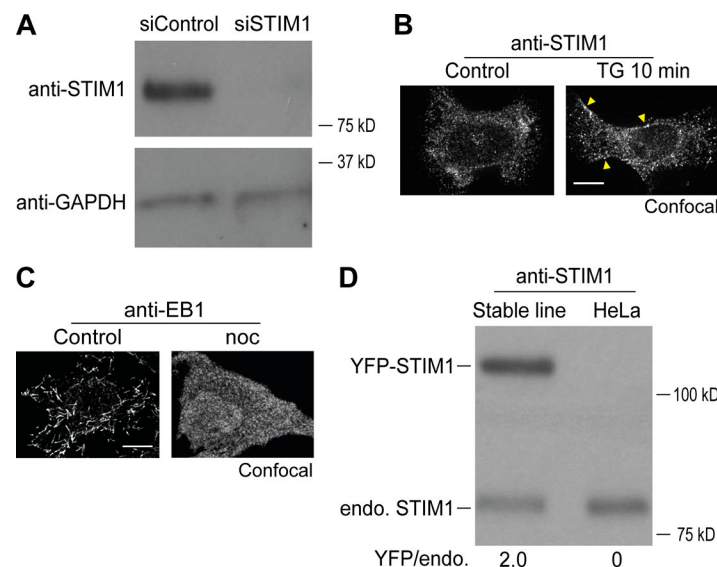

Figure S2. **Localization of endogenous STIM1 in HeLa cells and protein levels of YFP-STIM1 in HeLa cells stably expressing STIM1.** (A) Endogenous STIM1 protein detected by Western blotting using anti-STIM1 antibody in HeLa cells transfected with siControl or siSTIM1. (B) Localization of endogenous STIM1 in control and TG-treated HeLa cells, visualized by anti-STIM1 immunostaining using confocal microscopy. Yellow arrowheads indicate STIM1 puncta at the cell periphery, indicating STIM1 translocation to ER-PM junctions after ER  $\text{Ca}^{2+}$  store depletion. (C) Localization of endogenous EB1 after 10  $\mu$ M nocodazole (noc) treatment for 20 min, visualized by anti-EB1 immunostaining using confocal microscopy. Bars, 10  $\mu$ m. (D) Endogenous (endo.) STIM1 and exogenous YFP-STIM1 protein levels detected by Western blotting using anti-STIM1 antibody in HeLa cells stably expressing YFP-STIM1. The intensity of bands was measured by ImageJ. Ratio of YFP-STIM1 to endogenous STIM1 is indicated.

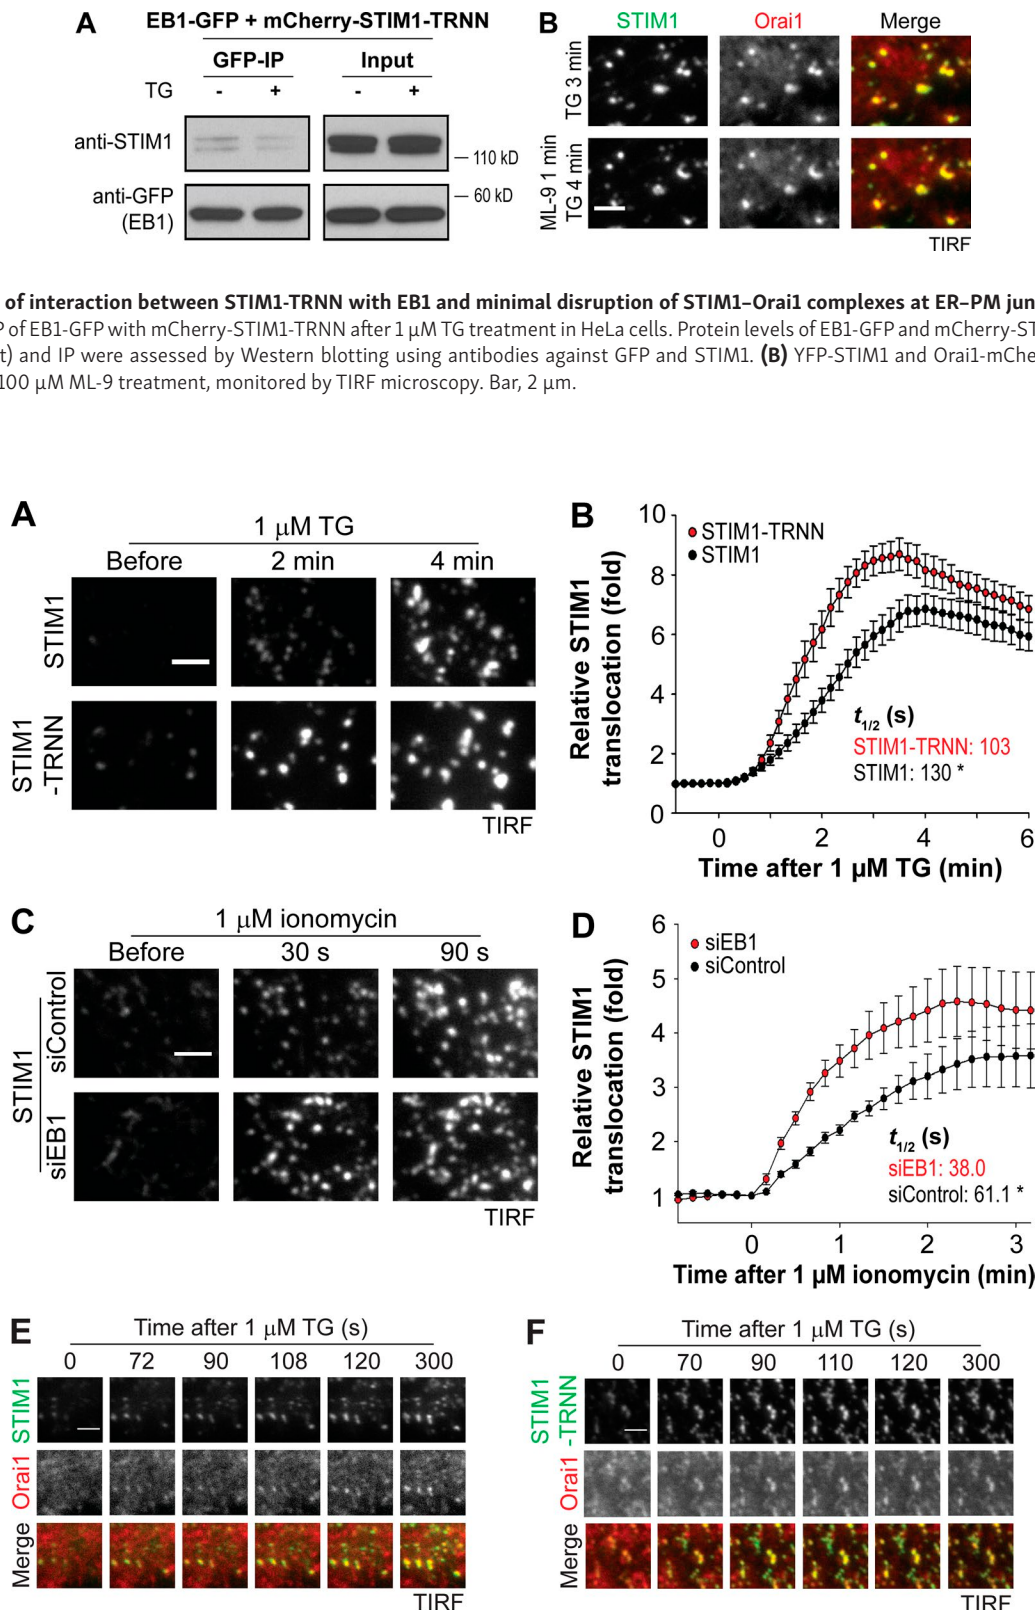

Figure S4. **EB1 binding impedes STIM1 translocation to ER-PM junctions during ER  $\text{Ca}^{2+}$  depletion.** (A) Translocation of YFP-STIM1 and YFP-STIM1-TRNN to ER-PM junctions after 1  $\mu$ M TG treatment in HeLa cells, monitored by TIRF microscopy. (B) Relative translocation to ER-PM junctions of YFP-STIM1 and YFP-STIM1-TRNN as described in A. 19–22 cells from four independent experiments. Mean times to the half-maximal translocation ( $t_{1/2}$ ) are indicated. (C) Translocation of YFP-STIM1 to ER-PM junctions after 1  $\mu$ M ionomycin treatment in HeLa cells transfected with siControl or siEB1, monitored by TIRF microscopy. (D) Relative translocation to ER-PM junctions of YFP-STIM1 as described in C. Means  $\pm$  SEM are shown. 9–10 cells from three independent experiments.  $t_{1/2}$  values are indicated. \*,  $P < 0.05$ . (E and F) Translocation to ER-PM junctions of YFP-STIM1 (E) and YFP-STIM1-TRNN (F) and corresponding Orai1-mCherry after 1  $\mu$ M TG treatment in HeLa cells, monitored by TIRF microscopy. Representative images are shown. Bars, 2  $\mu$ m.

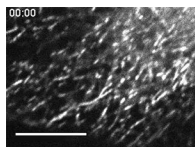

Video 1. **iMAPPER-633 tracks MT plus ends.** iMAPPER-633 displayed MT plus end-tracking movements toward the cell periphery, monitored by confocal microscopy in a HeLa cell transfected with YFP-iMAPPER-633. 6 s per frame; 36× playback speed. Bar, 10  $\mu$ m.

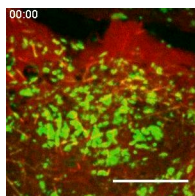

Video 2. **Activated STIM1 retains EB1 binding ability.** The activated mutant of YFP-STIM1-D76A (green) trapped by EB1-mCherry (red) after 100  $\mu$ M ML-9 treatment in a HeLa cell, monitored by confocal microscopy. 10 s per frame; 60× playback speed. Bar, 10  $\mu$ m.

Table S1. **Oligonucleotides used in this study**

| Name             | Sequence (5'-3')                                                                                    |
|------------------|-----------------------------------------------------------------------------------------------------|
| 2× FKBP F        | ATCGACTAGTGGAGCAGGTGCTCTCGAG (SpeI)                                                                 |
| 2× FKBP R        | ATCGAAGCTTTGCACTGCCTCCAGCTGA (HindIII)                                                              |
| MAPPER TM F      | ATCGAAGCTTCTGGATACAGTGCTCTTTGG (HindIII)                                                            |
| MAPPER cytosol R | ATCGCAATTGCCATTAGAATTGCTCTAGCAGC (MfeI)                                                             |
| STIM1 633 F      | CTAGGAATCCCAGCCGAGCCCTGCAAGCCAG (EcoRI)                                                             |
| CR               | CCTCTACAAATGTGGTATGG (BamHI)                                                                        |
| CT-TRNN F        | GCCGAAACACACGCAATAACCACTGGCTGGCAAGAAGGC                                                             |
| CT-TRNN R        | GCCAGCCAGGTGGTTATTGCGTGTGTTTCGGCTGGCTTG                                                             |
| STIM1-2K F       | CGGAAGAAGTTTCTCTCAAAATCTTTAAGAAGCCTCTTAAGAAGGGGGCGGGCGGAAGAAGTTTCTCTCAAAATCTTTAAGAAGCCTCTTAAGAAGTAG |
| STIM1-2K R       | CTACTTCTTAAGAGGCTTCTTAAGATTTTGAGAGGAACTTCTTCGCCCCGCCCCCTCTTAAGAGGCTTCTTAAGATTTTGAGAGGAACTTCTTCCG    |
| EB1 F            | GGAATCAGATCTCGAGATGGCAGTGAACGTATACTCAA (XhoI)                                                       |
| EB1 R            | GGCGACCGGTGGATCCGAATACTCTTCTTGCTCCTCCTG (BamHI)                                                     |
| siEB1 F          | GCGTAATACGACTCACTATAGGCGAGTACATCCAGAACTTCAAAA                                                       |
| siEB1 R          | GCGTAATACGACTCACTATAGGTCTTCTTGCTCCTCCTGTGG                                                          |
| siSTIM1 F        | GCGTAATACGACTCACTATAGGGGTGTTCTGTCTCTCCTTC                                                           |
| siSTIM1 R        | GCGTAATACGACTCACTATAGGGAGGCCTGAGTGAGATTAG                                                           |

F, forward; R, reverse.
